# Supplementary material
Source: HighWire-hosted journal article supplement (https://diabetes.diabetesjournals.org/content/suppl/2007/07/09/db06-1372)
Supplement: DB061372OnlineOnlyFig1.pdf [file DB061372OnlineOnlyFig1.pdf]

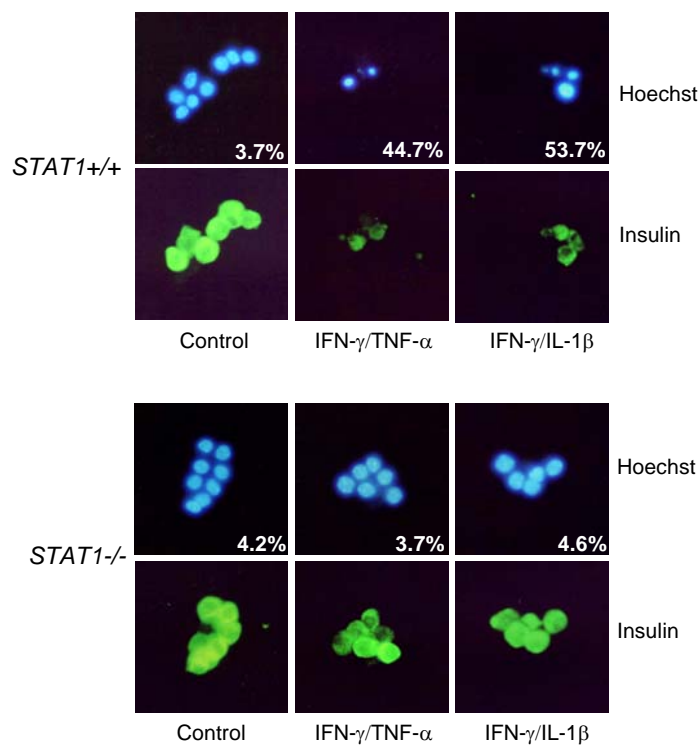

**Online appendix Fig. 1.** Death of insulin<sup>+</sup>  $\beta$ -cells by treatment with cytokine combinations. To detect death of  $\beta$ -cells, primary single islet cells from *STAT1*<sup>+/+</sup> and *STAT1*<sup>-/-</sup> mice were treated with cytokine combinations for 5 days and then fixed in 4% paraformaldehyde on chamber slides. Fixed cells were incubated with anti-insulin antibody, and then with FITC-conjugated anti-guinea pig IgG together with Hoechst33342 for fluorescent microscopy. The percentage of apoptotic cells with nuclear condensation/fragmentation among insulin<sup>+</sup>  $\beta$ -cells was calculated.
