# Supplementary material
Source: HighWire-hosted journal article supplement (https://diabetes.diabetesjournals.org/content/suppl/2007/07/09/db06-1372)
Supplement: DB061372OnlineOnlyFig2.pdf [file DB061372OnlineOnlyFig2.pdf]

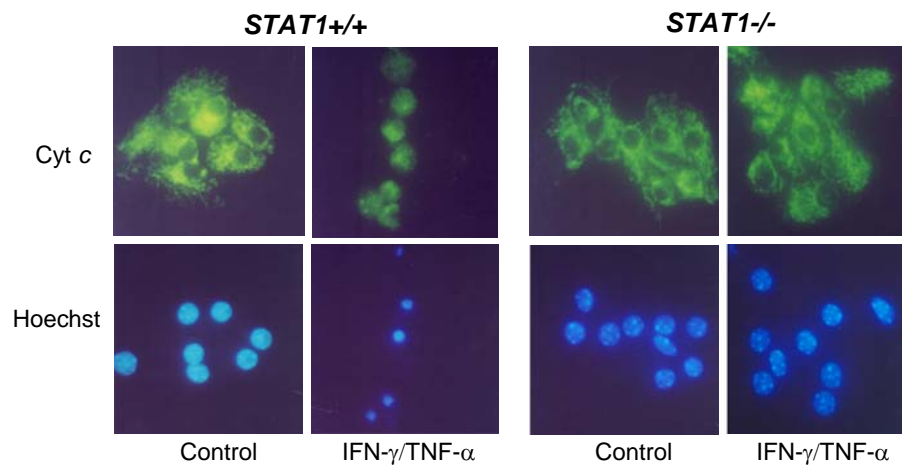

**Online appendix Fig. 2.** Cytochrome *c* release. Primary islet cells from *STAT1*<sup>+/+</sup> and *STAT1*<sup>-/-</sup> mice were treated with IFN- $\gamma$ /TNF- $\alpha$  combination for 3 days. Fixed cells were incubated with anti-cytochrome *c* antibody (PharMingen), and then with FITC-conjugated anti-mouse IgG together with Hoechst33342 for fluorescent microscopy.
